# Supplementary material
Source: publisher figshare collection journal article supplement (https://geolsoc.figshare.com/ndownloader/files/28010204)
Supplement: Supplementary file 1 [file 28010204]

## Sheet: LA-ICP-MS's results
Table S2a. U-Pb isotopic data of Permian granitic rocks defined by LA-ICP-MS method.
Analyze No.	Sample-grain	U (ppm)	Th/U	Ratios								Ages (Ma)
				207Pb/206Pb	±1σ	207Pb/235U	±1σ	206Pb/238U	±1σ	Error correlation		207Pb/206Pb	±1σ	206Pb/238U	±1σ
PSP2c (Muong Hum granite - O Quy Ho Pass)
1	PSP2c-01	102.304	0.452489	0.05053	0.00314	0.27254	0.02282	0.03912	0.00098	0.299186		219	116	247	6
2	PSP2c-03	135.658	0.534759	0.04774	0.00324	0.25509	0.02275	0.03876	0.001	0.289287		86	120	245	6
3	PSP2c-04	79.4418	0.534759	0.05569	0.00155	0.31327	0.01517	0.0408	0.00104	0.526389		440	51	258	6
4	PSP2c-05	158.288	0.520833	0.05465	0.0011	0.30369	0.01195	0.04031	0.001	0.630449		398	38	255	6
5	PSP2c-06	154.771	0.584795	0.0536	0.00106	0.2988	0.01162	0.04043	0.001	0.63602		354	37	255	6
6	PSP2c-07 (Core)	239.304	0.442478	0.05366	0.00112	0.30041	0.01219	0.0406	0.00103	0.625204		357	39	257	6
7	PSP2c-9	147.996	0.531915	0.0525	0.00115	0.29478	0.01226	0.04072	0.00103	0.608187		307	41	257	6
8	PSP2c-10 (Rim)	541.308	0.581395	0.0521	0.00065	0.29325	0.00834	0.04082	0.00098	0.844161		290	24	258	6
10	PSP2c-11	351.4	0.653595	0.05467	0.00114	0.28669	0.01158	0.03804	0.00096	0.624791		399	41	241	6
11	PSP2c-12 (Core)	151.004	0.483092	0.05129	0.00099	0.28271	0.01076	0.03999	0.00098	0.643878		254	39	253	6
12	PSP2c-13	319.173	1.02041	0.05247	0.00068	0.2807	0.00816	0.03881	0.00092	0.815448		306	26	245	6
13	PSP2c-14	163.799	0.558659	0.05146	0.00093	0.28223	0.01038	0.03978	0.00098	0.669834		261	37	251	6
14	PSP2c-16	75.0554	0.512821	0.054	0.00148	0.28897	0.01391	0.03882	0.001	0.535143		371	55	246	6
15	PSP2c-17 (Core)	271.755	0.671141	0.05003	0.0007	0.27615	0.0085	0.04004	0.00096	0.778939		196	29	253	6
16	PSP2c-19	193.975	0.581395	0.05025	0.00081	0.28323	0.00959	0.04089	0.00099	0.715054		207	33	258	6
Analyze No.	Sample-grain	U (ppm)	Th/U	Ratios								Ages (Ma)
				207Pb/206Pb	±1σ	207Pb/235U	±1σ	206Pb/238U	±1σ	Error correlation		207Pb/206Pb	±1σ	206Pb/238U	±1σ
PSP28d (Nam Xe - Tam Duong granite)
1	PSP28d-01 (Core)	314.493	0.384615	0.05173	0.00067	0.29031	0.00849	0.04071	0.00096	0.806352		273	27	257	6
2	PSP28d-02	847.96	1.04167	0.05096	0.00058	0.28551	0.00743	0.04064	0.00095	0.898261		239	23	257	6
3	PSP28d-03	299.088	0.540541	0.05272	0.0007	0.29611	0.00879	0.04074	0.00096	0.793806		317	27	257	6
4	PSP28d-05	162.319	0.60241	0.05048	0.00287	0.28175	0.02199	0.04048	0.00111	0.351335		217	126	256	7
5	PSP28d-06	202.834	0.636943	0.05093	0.0008	0.28895	0.00965	0.04115	0.00099	0.720378		238	35	260	6
6	PSP28d-07	484.028	1.02041	0.05338	0.00066	0.3013	0.00844	0.04094	0.00097	0.845825		345	27	259	6
7	PSP28d-08 (Core)	1013.21	0.699301	0.05222	0.0006	0.29801	0.00782	0.04139	0.00097	0.893101		295	25	261	6
8	PSP28d-09 (Core)	1260.92	0.574713	0.05203	0.00063	0.28995	0.008	0.04042	0.00096	0.860811		287	27	255	6
9	PSP28d-11	551.824	0.813008	0.05124	0.00061	0.29027	0.00785	0.04109	0.00097	0.872907		252	26	260	6
10	PSP28d-12	798.905	0.636943	0.05223	0.0006	0.28962	0.00758	0.04022	0.00095	0.902487		295	25	254	6
11	PSP28d-13	695.413	1.1236	0.05202	0.0006	0.29207	0.00777	0.04072	0.00096	0.886195		286	26	257	6
12	PSP28d-17	427.463	0.757576	0.05102	0.00064	0.2887	0.00825	0.04105	0.00098	0.835422		242	28	259	6
13	PSP28d-18	104.552	0.42735	0.05342	0.00136	0.3008	0.01378	0.04084	0.00104	0.555874		347	56	258	6
14	PSP28d-19	538.773	0.588235	0.0508	0.00063	0.29609	0.00834	0.04227	0.00101	0.848295		232	27	267	6
15	PSP28d-20	115.729	0.546448	0.05329	0.00114	0.30151	0.01234	0.04103	0.00102	0.607415		341	46	259	6
16	PSP28d-21	204.759	0.641026	0.05243	0.00093	0.30513	0.01108	0.04221	0.00104	0.678521		304	38	267	6
Analyze No.	Sample-grain	U (ppm)	Th/U	Ratios								Ages (Ma)
				207Pb/206Pb	±1σ	207Pb/235U	±1σ	206Pb/238U	±1σ	Error correlation		207Pb/206Pb	±1σ	206Pb/238U	±1σ
PSP31 (Phu Sa Phin/Phan Si Pan granite - Phan Si Pan Peak - 3143m)
1	PSP31-01	722.262	0.512821	0.0531	0.00098	0.28294	0.0105	0.03865	0.00095	0.662337		333	38	244	6
2	PSP31-02	119.587	0.444444	0.05247	0.00339	0.29562	0.02582	0.04087	0.00108	0.30255		306	135	258	7
3	PSP31-03	219.32	0.78125	0.05237	0.00171	0.28424	0.01496	0.03937	0.00095	0.458471		302	68	249	6
4	PSP31-04	144.211	0.469484	0.05634	0.00232	0.29796	0.01869	0.03836	0.00098	0.407283		466	84	243	6
5	PSP31-05	124.936	0.540541	0.05333	0.00329	0.29328	0.02464	0.03989	0.00104	0.310321		343	128	252	6
6	PSP31-06	167.462	0.458716	0.05487	0.0028	0.2936	0.0217	0.03881	0.00105	0.366051		407	105	245	7
7	PSP31-07	83.9305	0.389105	0.05377	0.00902	0.28413	0.05729	0.03832	0.00148	0.191547		361	331	242	9
8	PSP31-08	350.567	0.458716	0.05306	0.00162	0.28671	0.01503	0.0392	0.00106	0.515827		331	64	248	7
9	PSP31-09	178.528	0.436681	0.05553	0.00243	0.2959	0.01978	0.03865	0.00106	0.410275		434	90	244	7
10	PSP31-10	94.0704	0.549451	0.05358	0.00407	0.29271	0.029	0.03962	0.00106	0.270042		353	159	250	7
11	PSP31-11	184.23	0.505051	0.05666	0.00281	0.29821	0.02199	0.03818	0.00109	0.387157		478	101	242	7
12	PSP31-12	156.29	0.387597	0.05552	0.00267	0.29673	0.02114	0.03877	0.00106	0.383766		433	99	245	7
13	PSP31-13	251.945	0.44843	0.05484	0.00156	0.29308	0.0144	0.03876	0.00099	0.519846		406	59	245	6
14	PSP31-14	210.153	0.483092	0.05472	0.00233	0.29111	0.01914	0.03859	0.00107	0.42172		401	88	244	7
15	PSP31-15	1276.28	0.584795	0.05564	0.00068	0.29696	0.00824	0.03871	0.00091	0.847206		438	25	245	6
16	PSP31-16	122.733	0.515464	0.05439	0.00339	0.29308	0.02496	0.03909	0.00104	0.312399		387	130	247	6
17	PSP31-17	462.717	0.537634	0.05127	0.00147	0.28963	0.01407	0.041	0.001	0.502072		253	61	259	6
18	PSP31-18	375.798	0.52356	0.05783	0.00143	0.31109	0.01453	0.03902	0.00109	0.598081		523	50	247	7
19	PSP31-19	139.418	0.4329	0.05391	0.00325	0.2839	0.02375	0.0382	0.00104	0.325441		367	126	242	6
20	PSP31-20	127.344	0.452489	0.05427	0.00297	0.28916	0.02216	0.03865	0.00099	0.334237		382	114	244	6
21	PSP31-21	145.455	0.44843	0.04612	0.00259	0.24468	0.01917	0.03848	0.001	0.331697		4	108	243	6
22	PSP31-22	117.301	0.431034	0.05599	0.00375	0.29443	0.02664	0.03814	0.00104	0.30137		452	138	241	6
23	PSP31-23	137.289	0.371747	0.055	0.00291	0.29192	0.02215	0.0385	0.00104	0.35601		412	109	244	6
24	PSP31-24	146.809	0.478469	0.05407	0.00314	0.28046	0.02281	0.03763	0.00102	0.333282		374	121	238	6
Analyze No.	Sample-grain	U (ppm)	Th/U	Ratios								Ages (Ma)
				207Pb/206Pb	±1σ	207Pb/235U	±1σ	206Pb/238U	±1σ	Error correlation		207Pb/206Pb	±1σ	206Pb/238U	±1σ
PSP24 (Tu Le rhyolite)
1	PSP24-01 (Core)	405.92	1.33333	0.05574	0.0007	0.29319	0.00842	0.03815	0.00092	0.839712		442	28	241	6
2	PSP24-02	104.931	0.41841	0.05199	0.0017	0.2848	0.01566	0.03973	0.00108	0.494371		285	74	251	7
3	PSP24-03	113.034	0.413223	0.04923	0.00123	0.27554	0.0125	0.0406	0.00104	0.564653		159	57	257	6
4	PSP24-04	110.881	0.423729	0.05062	0.00122	0.28101	0.01247	0.04026	0.00103	0.576526		224	55	254	6
5	PSP24-05	128.992	0.342466	0.05672	0.00145	0.30868	0.01436	0.03947	0.00104	0.566396		481	55	250	6
6	PSP24-06	101.815	0.302115	0.05469	0.00231	0.28855	0.01924	0.03827	0.00112	0.43891		400	93	242	7
7	PSP24-07	117.552	0.549451	0.05181	0.00133	0.28898	0.01339	0.04045	0.00105	0.560219		277	58	256	7
8	PSP24-09	143.693	0.485437	0.05005	0.00104	0.28182	0.01135	0.04084	0.00103	0.626221		197	47	258	6
9	PSP24-10 (Core)	462.182	0.564972	0.05519	0.00071	0.30929	0.00902	0.04065	0.00099	0.835091		420	28	257	6
10	PSP24-11	366.263	0.662252	0.05245	0.0007	0.30158	0.00905	0.0417	0.00102	0.815113		305	30	263	6
11	PSP24-12	84.0286	0.341297	0.05431	0.00147	0.30682	0.01468	0.04097	0.00106	0.540751		384	60	259	7
12	PSP24-13	77.8912	0.52356	0.05614	0.0016	0.31165	0.01553	0.04026	0.00106	0.528357		458	62	254	7
13	PSP24-14	537.227	0.775194	0.05122	0.00064	0.28704	0.00815	0.04065	0.00099	0.857747		251	28	257	6
14	PSP24-15	171.396	0.367647	0.05292	0.00097	0.29001	0.01085	0.03974	0.001	0.672598		325	41	251	6
15	PSP24-16 (Core)	128.836	0.262467	0.05713	0.00156	0.31161	0.01521	0.03956	0.00106	0.548949		497	59	250	7
16	PSP24-17	92.9859	0.392157	0.05404	0.00136	0.30295	0.01384	0.04066	0.00105	0.565271		373	55	257	7
17	PSP24-18	204.998	0.558659	0.05047	0.00083	0.28296	0.0098	0.04066	0.00101	0.717221		217	37	257	6
18	PSP24-19	180.84	0.662252	0.05303	0.0009	0.29347	0.01038	0.04013	0.001	0.704526		330	37	254	6
19	PSP24-20	93.0113	0.392157	0.0544	0.00137	0.30442	0.01391	0.04059	0.00104	0.560738		388	55	256	6
20	PSP24-21	77.9399	0.512821	0.05436	0.00216	0.30334	0.01907	0.04047	0.00113	0.444144		386	87	256	7
21	PSP24-22	106.027	0.347222	0.05171	0.0013	0.28204	0.01284	0.03956	0.00101	0.560804		273	56	250	6
Analyze No.	Sample-grain	U (ppm)	Th/U	Ratios								Ages (Ma)
				207Pb/206Pb	±1σ	207Pb/235U	±1σ	206Pb/238U	±1σ	Error correlation		207Pb/206Pb	±1σ	206Pb/238U	±1σ
PSP29a (Tu Le rhyolite)
1	PSP29a-01	722.648	0.35461	0.05802	0.00395	0.32353	0.02954	0.04044	0.00117	0.316868		531	132	256	7
2	PSP29a-02	442.737	0.757576	0.05418	0.00084	0.30021	0.01001	0.04019	0.00098	0.731306		379	31	254	6
3	PSP29a-03	98.4046	0.52356	0.04974	0.00141	0.27342	0.01347	0.03987	0.00103	0.524389		183	64	252	6
4	PSP29a-04	105.002	0.568182	0.06349	0.00351	0.34303	0.02741	0.03919	0.00112	0.357656		725	112	248	7
5	PSP29a-05	264.53	0.458716	0.05117	0.00068	0.2832	0.00844	0.04014	0.00096	0.802499		248	30	254	6
6	PSP29a-06	75.6947	0.409836	0.0525	0.00146	0.28773	0.01394	0.03975	0.00101	0.524453		307	61	251	6
7	PSP29a-07	140.909	0.403226	0.04956	0.00092	0.27241	0.01011	0.03987	0.00097	0.655537		174	42	252	6
8	PSP29a-08	273.352	0.617284	0.05206	0.00069	0.2883	0.00856	0.04017	0.00096	0.804897		288	29	254	6
9	PSP29a-09	105.01	0.413223	0.05535	0.00121	0.30056	0.0125	0.03939	0.00099	0.604325		426	47	249	6
10	PSP29a-10	63.8175	0.45045	0.05363	0.00172	0.29696	0.01581	0.04016	0.00104	0.486414		356	70	254	6
11	PSP29a-11	98.8337	0.408163	0.05288	0.0012	0.29806	0.01266	0.04088	0.00102	0.587434		324	50	258	6
12	PSP29a-12 (Core)	701.279	0.248756	0.05543	0.00274	0.30008	0.02126	0.03926	0.00107	0.384687		430	106	248	7
13	PSP29a-13 (Core)	1049.88	0.909091	0.04614	0.00319	0.24324	0.02153	0.03824	0.00103	0.304306		5	139	242	6
15	PSP29a-14	170.567	0.27027	0.05449	0.00096	0.30459	0.01104	0.04054	0.00101	0.68736		391	38	256	6
16	PSP29a-16	63.7124	0.408163	0.05524	0.00185	0.30947	0.0171	0.04064	0.00108	0.480942		422	72	257	7
17	PSP29a-17	100.907	0.699301	0.05202	0.00457	0.27974	0.03162	0.039	0.00118	0.267676		286	188	247	7
18	PSP29a-19	116.542	0.442478	0.05031	0.00479	0.25972	0.0311	0.03744	0.00115	0.256512		209	200	237	7
19	PSP29a-20	285.789	0.497512	0.04801	0.00345	0.24816	0.02302	0.03749	0.00105	0.301926		100	150	237	7
20	PSP29a-21	132.716	0.549451	0.05463	0.00123	0.29902	0.01268	0.0397	0.00101	0.599946		397	49	251	6
Analyze No.	Sample-grain	U (ppm)	Th/U	Ratios								Ages (Ma)
				207Pb/206Pb	±1σ	207Pb/235U	±1σ	206Pb/238U	±1σ	Error correlation		207Pb/206Pb	±1σ	206Pb/238U	±1σ
PSP30 (Tu Le rhyolite)
1	PSP30-01	121.174	0.371747	0.05023	0.00483	0.27381	0.03364	0.03954	0.00121	0.249082		206	199	250	8
2	PSP30-02	68.1403	0.549451	0.05416	0.00748	0.29877	0.0496	0.04001	0.00127	0.191201		378	287	253	8
3	PSP30-03	267.362	0.555556	0.05323	0.00255	0.28994	0.02084	0.03951	0.00112	0.394386		339	100	250	7
4	PSP30-04	126.345	0.49505	0.05248	0.00298	0.29111	0.02292	0.04024	0.00103	0.325104		306	120	254	6
5	PSP30-05	340.059	0.529101	0.04646	0.00127	0.25495	0.01203	0.0398	0.00098	0.521834		22	51	252	6
6	PSP30-06	137.332	0.425532	0.05179	0.00352	0.28423	0.02628	0.03981	0.00113	0.306995		276	142	252	7
7	PSP30-07	137.828	0.434783	0.05559	0.00442	0.30284	0.03212	0.03953	0.00122	0.290985		436	165	250	8
8	PSP30-08	159.614	1.44928	0.05463	0.0031	0.29153	0.02347	0.03872	0.00108	0.346464		397	118	245	7
9	PSP30-09	122.365	0.505051	0.05566	0.00483	0.29205	0.0331	0.03807	0.00117	0.271164		439	180	241	7
10	PSP30-10	209.404	0.502513	0.05208	0.00255	0.28035	0.01998	0.03904	0.00103	0.370197		289	103	247	6
11	PSP30-11	245.544	0.970874	0.05359	0.00184	0.28979	0.01625	0.03923	0.00103	0.468219		354	72	248	6
12	PSP30-12	183.256	0.526316	0.05465	0.00227	0.2913	0.01841	0.03866	0.001	0.409284		398	86	245	6
13	PSP30-13	125.155	0.421941	0.05616	0.00471	0.29287	0.03257	0.03784	0.0012	0.285159		459	173	239	7
14	PSP30-14	247.196	0.46729	0.05133	0.0024	0.2859	0.0197	0.0404	0.00106	0.380779		256	99	255	7
15	PSP30-15	79.4902	0.413223	0.05716	0.00561	0.29888	0.03688	0.03793	0.0011	0.235026		498	202	240	7
16	PSP30-16	106.964	0.483092	0.0521	0.00427	0.29218	0.0309	0.04068	0.00112	0.260333		290	170	257	7
17	PSP30-17	62.0585	0.378788	0.05332	0.00697	0.29	0.04554	0.03945	0.00118	0.190476		342	271	249	7
18	PSP30-18	177.417	0.416667	0.05135	0.00255	0.28241	0.02017	0.03989	0.00102	0.358022		257	106	252	6
19	PSP30-19	126.011	0.735294	0.05541	0.00379	0.29364	0.02733	0.03845	0.0011	0.307377		429	142	243	7
20	PSP30-20	156.179	0.458716	0.05062	0.00246	0.28462	0.02019	0.04079	0.00108	0.373249		224	103	258	7
21	PSP30-21	105.083	0.456621	0.0529	0.00477	0.29248	0.03374	0.04011	0.00116	0.250701		325	187	254	7
22	PSP30-22	580.303	1.06383	0.05388	0.00201	0.29385	0.01842	0.03956	0.00123	0.496004		366	77	250	8
23	PSP30-23	142.458	0.775194	0.05403	0.00402	0.29339	0.02951	0.03939	0.0012	0.302881		372	156	249	7
24	PSP30-24	110.268	0.406504	0.0534	0.00458	0.28978	0.03238	0.03936	0.00118	0.268299		346	178	249	7

## Sheet: CA-ID-TIMS's results
Table S2b. U-Pb isotopic data of Permian granitic rocks defined by CA-ID-TIM method* (from Shellnutt et al., 2020).
Fraction	wt.(μg)	U (ppm)	Pbc (pg)	mol% Pb*	Th/U	206Pb/204Pb	207Pb/206Pb	± (%)	207Pb/235U	± (%)	206Pb/238U	± (%)	ρ	206Pb/238U Age (Ma)	± (Ma)	207Pb/206Pb Age (Ma)	± (Ma)
PSP-2c: 1 zircon per fraction
1	0.2	102	0.2	97	0.55	194	0.05159	0.71	0.2896	0.76	0.040713	0.09	0.51	257.25	0.24	267	16.4
2	0.4	197	0.4	91	0.64	474	0.05107	1.12	0.2868	1.2	0.040732	0.11	0.71	257.37	0.29	244	25.9
3	0.3	262	0.4	90	0.64	477	0.05102	1.12	0.2866	1.19	0.040736	0.11	0.7	257.39	0.29	242	25.7
4	0.1	210	0.3	92	0.68	171	0.05148	0.84	0.2889	0.9	0.040703	0.1	0.58	257.19	0.25	262	19.4
5	0.2	65	0.3	91	0.76	222	0.05741	0.57	0.6591	0.61	0.08327	0.1	0.48	515.61	0.5	507	12.5
PSP-29: 1 zircon per fraction
1	0.2	47	0.6	41	0.52	54	0.05137	2.68	0.2885	2.85	0.04073	0.26	0.66	257.4	0.7	257.3	61.6
2	0.4	173	2.6	55	0.87	84	0.05199	1.68	0.2921	1.78	0.04075	0.12	0.85	257.5	0.3	284.9	38.4
3	0.3	36	0.5	53	1.02	66	0.05106	2.61	0.2873	2.77	0.04081	0.24	0.69	257.9	0.6	243.6	60.1
4	0.4	235	0.4	91	1	468	0.05142	0.26	0.2896	0.28	0.04084	0.06	0.4	258	0.2	259.7	5.9
5	0.2	42	0.3	52	0.64	66	0.05168	1.85	0.2912	1.97	0.04087	0.25	0.53	258.2	0.7	271.4	42.5
6	0.2	57	0.4	55	0.84	73	0.05187	1.99	0.2927	2.11	0.04092	0.21	0.63	258.5	0.5	279.7	45.5
PSP-24: 1 zircon per fraction
1	0.2	132	0.2	87	0.43	91	0.05204	8.96	0.2919	9.57	0.040678	0.63	0.97	257.03	1.62	287	204.8
2	0.2	122	0.2	77	0.41	57	0.05008	10.9	0.2802	11.58	0.04057	0.74	0.96	256.37	1.9	199	252.5
3	0.2	142	0.3	84	0.49	80	0.05155	5.98	0.2898	6.39	0.040759	0.45	0.91	257.53	1.15	266	137.3
4	0.3	146	0.2	98	0.74	166	0.05189	5.69	0.2908	6.08	0.040646	0.42	0.93	256.84	1.07	281	130.2
5	0.3	124	0.2	87	0.58	84	0.05095	7.54	0.286	8.04	0.040703	0.51	0.97	257.19	1.32	239	173.9
PSP-31: 1 zircon per fraction
1	0.2	189	0.4	93	0.65	114	0.05349	6.6	0.2997	7.07	0.04064	0.47	0.98	256.8	1.22	350	149.3
2	0.2	180	0.2	99	0.74	212	0.05155	3.62	0.288	3.87	0.040515	0.26	0.94	256.02	0.67	266	83.1
3	0.4	178	0.3	98	0.48	282	0.05124	2.95	0.2865	3.15	0.040555	0.24	0.84	256.27	0.61	252	68
4	0.3	155	0.3	93	0.4	144	0.05031	6.88	0.2819	7.33	0.040629	0.46	0.98	256.73	1.18	209	159.4
5	0.2	136	0.2	87	0.58	84	0.05089	7.55	0.2851	8.04	0.040587	0.51	0.97	256.47	1.32	236	174.2
*Shellnutt, J.G., Pham, T.T, Denyszyn, S., Yeh, M.W, Tran, T.A, 2020. Magmatic duration of the Emeishan large igneous province: Insight from northern Vietnam: Geology, 48, 5, 457–461.
